# Supplementary material for: Psychometric Analysis of the Czech Version of the Toronto Empathy Questionnaire
Source: MDPI journal article supplement (doi:10.3390/ijerph18105343), 2021-05-17
Supplement: s1 [file s1]

**Supplementary Table S1:** Socio-demographic results

| Socio-demographic variables | Variable                                                | n (%)       | Empathy score               |            |                             |
|-----------------------------|---------------------------------------------------------|-------------|-----------------------------|------------|-----------------------------|
|                             |                                                         |             | 25 <sup>th</sup> percentile | M (SD)     | 75 <sup>th</sup> percentile |
| Gender                      | Male                                                    | 353 (31.5%) | 18.00                       | 19.6 (4.1) | 22.00                       |
|                             | Female                                                  | 767 (68.5%) | 20.00                       | 21.8 (3.3) | 24.00                       |
| Family status               | In relationship                                         | 462 (41.8%) | 19.00                       | 21.1 (3.5) | 24.00                       |
|                             | No relationship                                         | 333 (30.1%) | 18.00                       | 20.2 (4.2) | 23.00                       |
|                             | Married                                                 | 246 (22.2%) | 20.00                       | 22.0 (3.2) | 25.00                       |
|                             | Divorced                                                | 28 (2.53%)  | 20.75                       | 22.6 (3.7) | 25.00                       |
|                             | Widow                                                   | 18 (1.63%)  | 17.25                       | 20.2 (4.5) | 24.00                       |
|                             | Friar                                                   | 19 (1.72%)  | 19.50                       | 21.9 (3.6) | 25.00                       |
|                             |                                                         |             |                             |            |                             |
| Education                   | Basic school                                            | 73 (6.41%)  | 18.00                       | 20.4 (4.6) | 24.00                       |
|                             | Vocational school/high school without a graduation exam | 55 (4.83%)  | 19.00                       | 21.9 (3.9) | 25.00                       |
|                             | High school                                             | 490 (43.1%) | 19.00                       | 21.0 (3.6) | 24.00                       |
|                             | Higher vocational school                                | 43 (3.78%)  | 19.00                       | 21.4 (3.2) | 24.00                       |
|                             | University unspecified                                  | 345 (30.3%) | 19.00                       | 21.1 (3.6) | 24.00                       |
|                             | University bachelor                                     | 29 (2.55%)  | 20.00                       | 20.3 (6.1) | 23.00                       |
|                             | University master or Dr                                 | 103 (9.05%) | 19.00                       | 21.6 (3.2) | 24.00                       |
|                             |                                                         |             |                             |            |                             |
| Economical status           | Student                                                 | 384 (36.1%) | 19.00                       | 21.1 (3.7) | 24.00                       |
|                             | Invalidity pensioner                                    | 10 (0.94%)  | 22.00                       | 21.7 (7.8) | 25.00                       |
|                             | Employed                                                | 451 (42.3%) | 19.00                       | 21.2 (3.5) | 24.00                       |
|                             | Entrepreneur                                            | 80 (7.51%)  | 19.00                       | 20.8 (4.5) | 24.00                       |
|                             | In household                                            | 17 (1.60%)  | 18.00                       | 20.4 (3.0) | 23.00                       |
|                             | Without work                                            | 15 (1.41%)  | 17.50                       | 19.1 (3.1) | 21.00                       |
|                             | Pensioner                                               | 28 (2.63%)  | 16.75                       | 20.8 (4.2) | 24.25                       |
|                             | Maternity leave                                         | 80 (7.51%)  | 18.75                       | 20.8 (4.1) | 24.00                       |
| Religiosity                 | Religious, member of a church                           | 286 (25.2%) | 20.00                       | 21.8 (3.3) | 24.00                       |
|                             | Religious, not a member of a church                     | 256 (22.6%) | 19.00                       | 21.7 (3.3) | 24.00                       |
|                             | Non-religious                                           | 497 (43.9%) | 18.50                       | 20.7 (4.0) | 23.00                       |
|                             | Atheist                                                 | 94 (8.30%)  | 17.00                       | 19.3 (4.3) | 22.00                       |

*Note.* M = mean, SD = Standard Deviation, *n* = number of subjects
